# Supplementary material
Source: PubMed Central journal article supplement (PMC6935866)
Supplement: cr9b00525_si_001.pdf [file cr9b00525_si_001.pdf]

# Evolution and Diversity of Assembly-Line Polyketide Synthases

Aleksandra Nivina<sup>a,b</sup>, Kai P. Yuet<sup>a,b</sup>, Jake Hsu<sup>b,c</sup>, and Chaitan Khosla<sup>a,b,c,\*</sup>

<sup>a</sup>Department of Chemistry, <sup>b</sup>Stanford ChEM-H, <sup>c</sup>Department of Chemical Engineering  
Stanford University, Stanford, CA 94305, USA

\*Corresponding author, khosla@stanford.edu

## Supplementary information

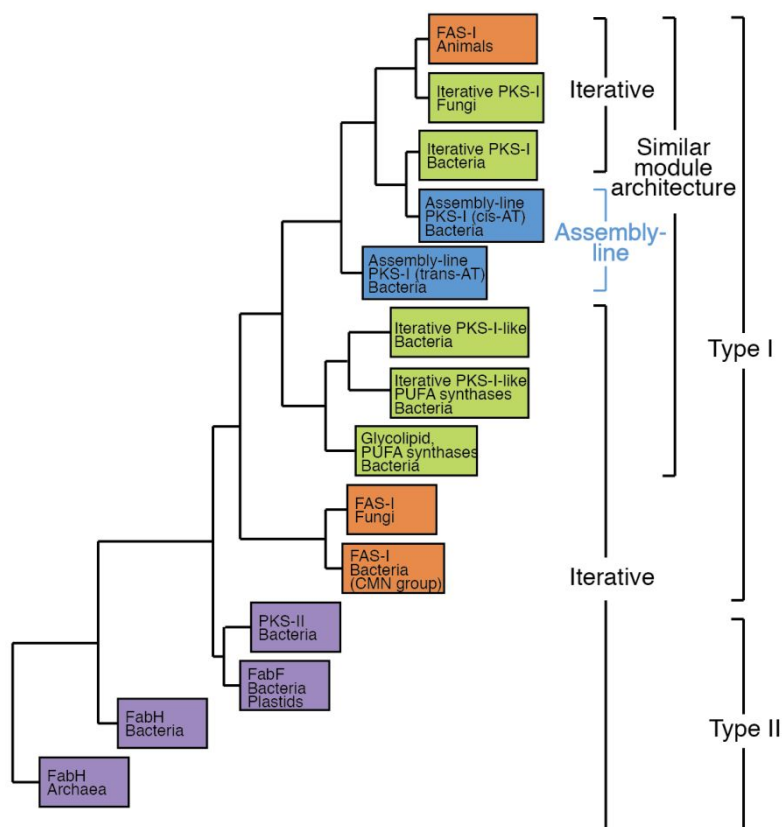

**Supplementary Figure S1.** Schematic representation of phylogenetic relationships between KS domains from different types of FASs and PKSs, as inferred by Bayesian statistics. Adapted from Jenke-Kodama *et al.* 2005<sup>1</sup> and Jenke-Kodama *et al.* 2009.<sup>2</sup>

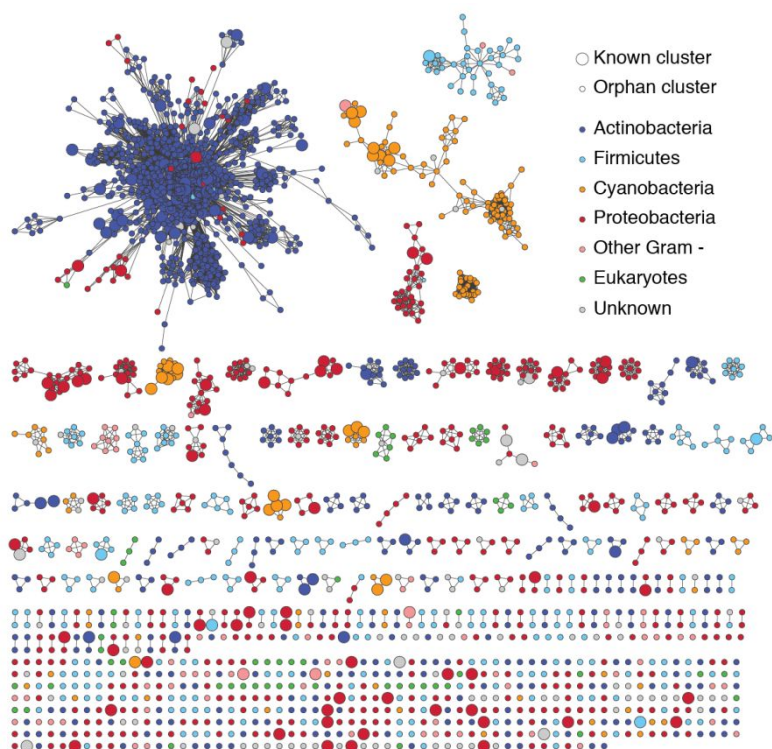

**Supplementary Figure S2.** Network of 3,551 distinct assembly-line PKS clusters, visualized by Cytoscape 3.7.2<sup>3</sup>. Nodes correspond to known clusters (larger circles) and "orphans" (smaller circles), color coded according to the phylum of their host (graphical legend). Edges represent >50% sequence similarity between two clusters, calculated as described in <sup>4</sup>.

The catalog, the dendrogram and the network file are available online:  
[http://web.stanford.edu/group/orphan\\_pks/](http://web.stanford.edu/group/orphan_pks/)

The code used in this work is available on GitHub:  
[https://github.com/aleksnivina/Orphan\\_PKS\\_catalog](https://github.com/aleksnivina/Orphan_PKS_catalog)

- (1) Jenke-Kodama, H.; Sandmann, A.; Müller, R.; Dittmann, E. Evolutionary Implications of Bacterial Polyketide Synthases. *Mol. Biol. Evol.* **2005**, *22*, 2027–2039.
- (2) Jenke-Kodama, H.; Dittmann, E. Evolution of Metabolic Diversity: Insights From Microbial Polyketide Synthases. *Phytochemistry* **2009**, *70*, 1858–1866.
- (3) Shannon, P.; Markiel, A.; Ozier, O.; Baliga, N. S.; Wang, J. T.; Ramage, D.; Amin, N.; Schwikowski, B.; Ideker, T. Cytoscape: a Software Environment for Integrated Models of Biomolecular Interaction Networks. *Genome Res.* **2003**, *13*, 2498–2504.
- (4) O'Brien, R. V.; Davis, R. W.; Khosla, C.; Hillenmeyer, M. E. Computational Identification and Analysis of Orphan Assembly-Line Polyketide Synthases. *J. Antibiot.* **2014**, *67*, 89–97.
